# Supplementary material
Source: PubMed Central journal article supplement (PMC3596486)
Supplement: NIHMS428078-supplement-01.pdf [file NIHMS428078-supplement-01.pdf]

Supplementary Data.

Table 2. Primers used for quantitative Real-Time PCR (qPCR) analysis.

| <b>Transcript<br/>(accession #)</b> | <b>Forward Primer</b>          | <b>Reverse Primer</b>          | <b>Amplicon<br/>(bp)</b> | <b>Tm (°C)</b> |
|-------------------------------------|--------------------------------|--------------------------------|--------------------------|----------------|
| OcaHd_03<br>(GT154744)              | 5'-TGCAACCAGCCATTAGAAGAA-3'    | 5'-CAGAAGGATGTGGGAGTTTTT-3'    | 124                      | 50             |
| OcaOv_012<br>(GT154626)             | 5'-AATTCTTTTTGCCCTCACGA-3'     | 5'-ACGACCGCATTATCTATTCTTTAC-3' | 142                      | 50             |
| OcaOv_014a<br>(GT154627)            | 5'-GGGGAGTAAAATGCCATCTGAAGT-3' | 5'-AGTGCCATTTATAACCCATTTGAC-3' | 127                      | 64             |
| OcaOv_054a<br>(GT154652)            | 5'-ACGATTTTGGCGGTATGC-3'       | 5'-GCTTCGTGGGCTTTTTCTG-3'      | 152                      | 52             |
